# Supplementary material for: MicroRNAs in ascending thoracic aortic aneurysms
Source: Oxford University Press journal article supplement (doi:10.1042/bsr20200218), 2020-07-01
Supplement: bsr-2020-0218_supp.pdf [file bsr-2020-0218_supp.pdf]

**Supplementary Table 1**

| <b>Sample ID</b> | <b>Sample Type</b> | <b>260/280</b> | <b>260/230</b> | <b>Concentration<br/>(ng/μl)</b> |
|------------------|--------------------|----------------|----------------|----------------------------------|
| 148 BB 2.3       | Plasma             | 1.45           | 0.53           | 33                               |
| 148 BB 2.3       | Plasma             | 1.53           | 0.61           | 11                               |
| 162 BB 2.3       | Plasma             | 1.38           | 0.50           | 8                                |
| 162 BB 2.3       | Plasma             | 1.61           | 0.27           | 3                                |
| 206 BB 2.3       | Plasma             | 1.45           | 0.58           | 13                               |
| 206 BB 2.3       | Plasma             | 1.44           | 0.55           | 22                               |
| 224 BB 2.3       | Plasma             | 1.47           | 0.62           | 5.5                              |
| 224 BB 2.3       | Plasma             | 1.43           | 0.64           | 20                               |
| 148 T4           | Tissue             | 2.03           | 1.95           | 65                               |
| 162 T4           | Tissue             | 2.1            | 1.71           | 82                               |
| 206 T4           | Tissue             | 2.03           | 1.94           | 73                               |
| 224 T4           | Tissue             | 2.05           | 1.80           | 52                               |
